# Supplementary material for: Self-healing composite hydrogel with antibacterial and reversible restorability conductive properties
Source: Royal Society of Chemistry journal article supplement (doi:10.1039/d0ra00089b), 2020-01-01
Supplement: d0ra00089b1.pdf [file d0ra00089b1.pdf]

*Supporting Information for*

**Self-Healing Composite Hydrogel with Antibacterial and Reversible Restorability Conductive Properties**

Mimpin Ginting<sup>a†\*</sup>, Subur P. Pasaribu<sup>b†</sup>, Indra Masmur<sup>a</sup>, Jamaran Kaban<sup>a</sup>, and Hestina<sup>c</sup>

<sup>a</sup>Department of Chemistry, Faculty of Mathematics and Natural Sciences, Universitas Sumatera Utara, Medan-20155, Indonesia.

<sup>b</sup>Department of Chemistry, Faculty of Mathematics and Natural Sciences, Mulawarman University, Samarinda-75123, Indonesia.

<sup>c</sup>Department of Chemistry, Universitas Sari Mutiara Indonesia, Medan-20123, Indonesia.

†Ginting, M. and Pasaribu S. P. contributed equally to this work.

\*Corresponding Author: Mimpin Ginting, Department of Chemistry, Faculty of Mathematics and Natural Sciences, Universitas Sumatera Utara, Medan-20155, Indonesia.

e-mail: [mimpin.ginting@yahoo.com](mailto:mimpin.ginting@yahoo.com)

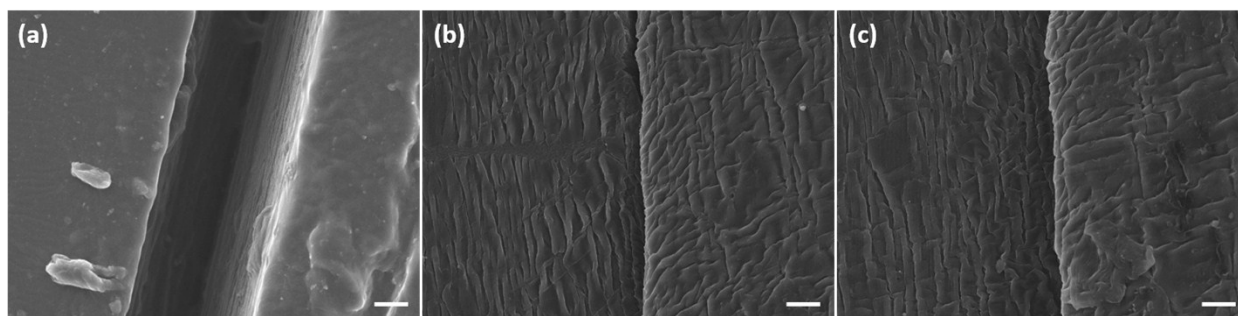

**Fig. 1S.** SEM images of hydrogels during self-healing processes (a) cut-off; healed at 37°C for (b) 6 h; and (c) 12 h at magnification of x1000 (scale bar 10 $\mu$ m).
